# Supplementary material for: Transitioning Multidisciplinary Craniofacial Care to Telehealth during the COVID-19 Pandemic: A Single Center Experience
Source: PubMed Central journal article supplement — Plast Reconstr Surg Glob Open. 2020 Sep 14;8(9):e3143. doi: 10.1097/GOX.0000000000003143 (PMC7544296; doi:10.1097/gox.0000000000003143), 2020-09-14
Supplement: gox-8-e3143-s001.pdf [file gox-8-e3143-s001.pdf]

## UCSF Craniofacial Center Survey

Thank you for participating in this survey. The following questions ask about your child's most recent **video appointment** at the UCSF Craniofacial Center at Mission Bay. **Your responses will be kept anonymous.**

1. What type of video appointment did you most recently have at the UCSF Craniofacial Center?
  - a. New patient visit (first time seeing your provider)
  - b. Preoperative follow up visit (not first time seeing your provider, have not undergone surgery)
  - c. Postoperative follow up visit (less than 1 year since surgery)
  - d. Long term follow-up visit (over 1 year since surgery)

2. Please rate how much you agree with the following statements:

|                                                                                                                                         | Strongly disagree | Somewhat disagree | Neither agree nor disagree | Somewhat agree | Strongly agree |
|-----------------------------------------------------------------------------------------------------------------------------------------|-------------------|-------------------|----------------------------|----------------|----------------|
| I was satisfied with my video appointment.                                                                                              | 1                 | 2                 | 3                          | 4              | 5              |
| I felt comfortable using the video technology for this appointment.                                                                     | 1                 | 2                 | 3                          | 4              | 5              |
| I saved time by having this appointment over video, instead of in person.                                                               | 1                 | 2                 | 3                          | 4              | 5              |
| I saved money by having this appointment over video, instead of in person.                                                              | 1                 | 2                 | 3                          | 4              | 5              |
| Even before the COVID-19 pandemic, I would have preferred having this appointment over video instead of coming to the clinic in person. | 1                 | 2                 | 3                          | 4              | 5              |

3. If you saved **money** by having this appointment over video, instead of in person, **how many estimated dollars did you save?** This includes the cost to travel to the clinic, hotel fees, parking fees, etc. Please enter a dollar amount.

\$ \_\_\_\_\_

4. If you saved **time** by having this appointment over video, instead of in person, **how many estimated hours did you save?** This includes the time to travel to the clinic, time spent waiting at the clinic, etc. Please enter the number of hours.

\_\_\_\_\_ hours

5. If you have any other comments, please write them here:

---

---

---

---

---

---

---
